# Supplementary material
Source: PubMed Central journal article supplement (PMC5818194)
Supplement: supp_RA117.000121_132662_2_supp_30548_p08l2v.pdf [file supp_RA117.000121_132662_2_supp_30548_p08l2v.pdf]

## Supplementary Information

PvdO is required for the oxidation of dihydropyoverdine as last step of fluorophore formation in *Pseudomonas fluorescens* \*Michael T. Ringel<sup>1</sup>, Gerald Dräger<sup>2</sup>, and Thomas Brüser<sup>1,3</sup>

From the <sup>1</sup>Institute of Microbiology, Leibniz Universität Hannover, Herrenhäuser Str. 2, 30419 Hannover, Germany, the <sup>2</sup>Institute of Organic Chemistry, Leibniz Universität Hannover, Schneiderberg 1 B, 30167 Hannover, Germany

\*Running title: *Dihydropyoverdine oxidation by PvdO*

List of supplementary material:

Video S1: Morphing animation of the two homology-modelled structures of PvdO using either formylglycine generating enzyme (FGE) from *Streptomyces coelicolor* (PDB 2Q17) or PvdO from *Pseudomonas aeruginosa* (PDB 5HHA) as template. Residues that have been exchanged for alanine's in this study are highlighted in blue.

Figure S1: Activity measurement of PvdO and the PvdO<sub>E260A</sub> proteins in comparison to chemical autoxidation

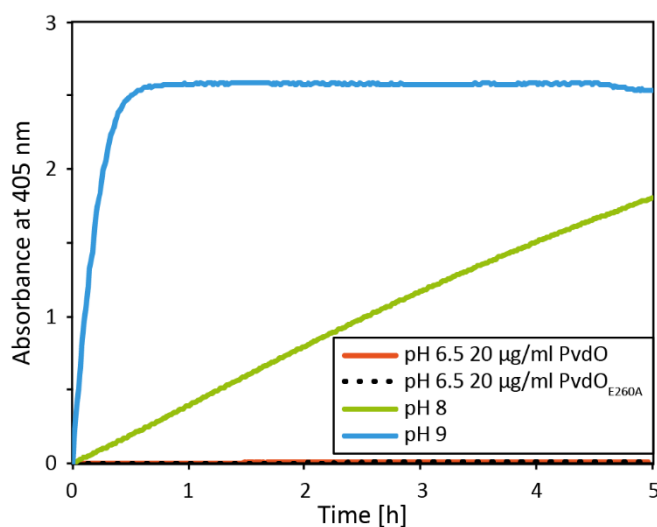

**Figure S1: Activity measurement of PvdO and the PvdO<sub>E260A</sub> proteins in comparison to chemical autoxidation.** The purified PvdO and PvdO<sub>E260A</sub>-proteins were tested for activity *in vitro* at pH 6.5 (as described in the methods section), under the same measurement conditions used for the chemical autoxidation that is shown for comparison (pH 8 and pH 9). Note that at pH 6.5 no autoxidation occurs and that there is no detectable *in vitro* activity of PvdO as purified. All values are corrected for blank measurements and the first measurement point was set to 0.
